# Supplementary material
Source: MDPI journal article supplement (https://www.mdpi.com/2079-6412/8/11/396)
Supplement: s1 [file s1]

## Supplementary Material

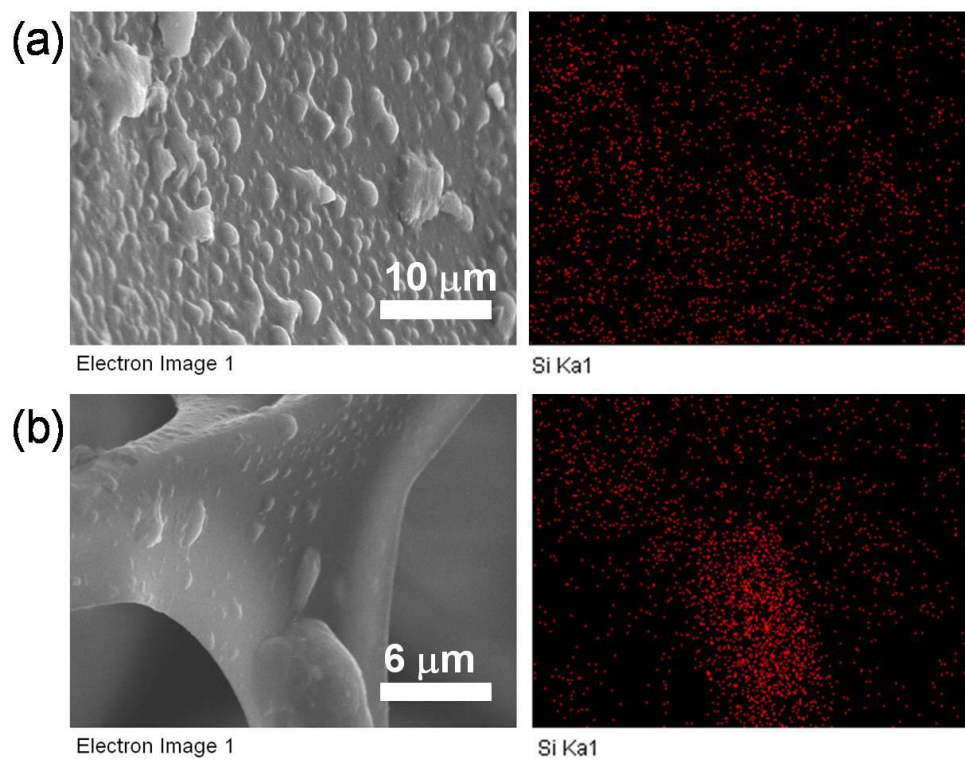

**Figure S1.** SEM images and element distribution maps of (a) the superhydrophobic PU sponge, (b) the superhydrophobic melamine sponge.

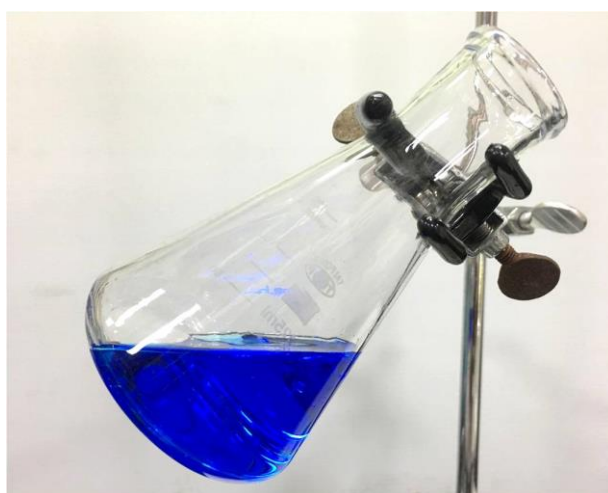

**Figure S2.** Photograph of the oil collected via the continuous absorption and removal of isooctane from the water surface.

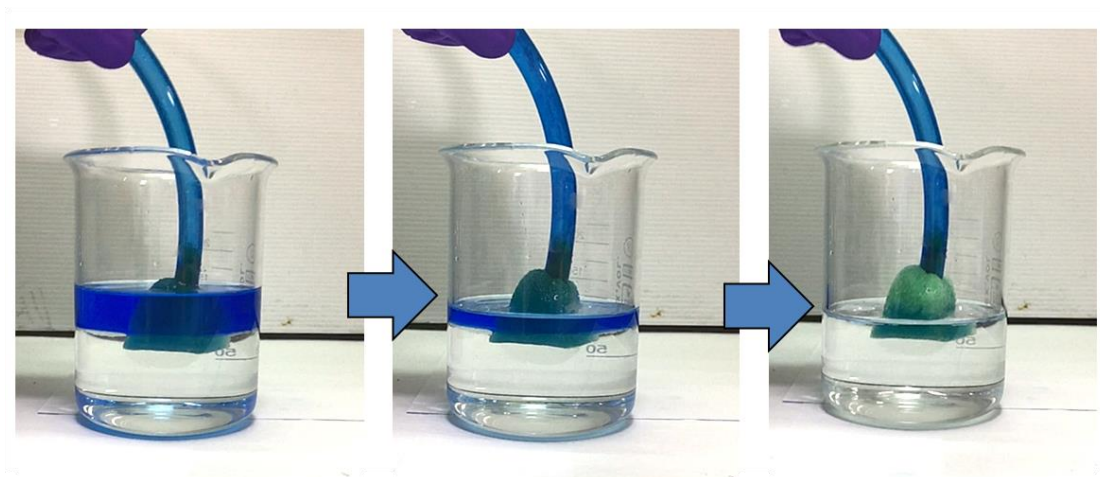

**Figure S3.** Photographs of the continuous absorption and removal of isooctane oil from the surfaces of 0.1 M  $\text{HCl}_{(\text{aq})}$  using the superhydrophobic PU sponge.

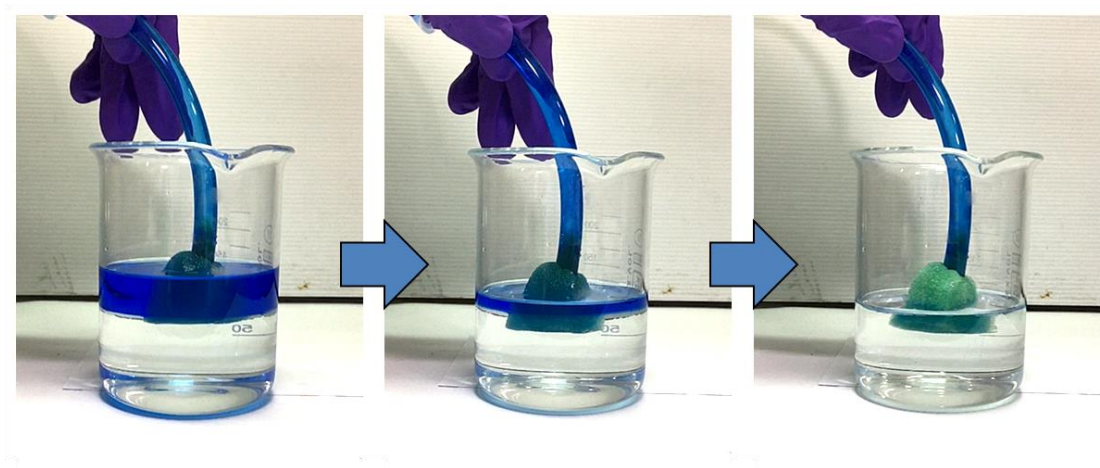

**Figure S4.** Photographs of the continuous absorption and removal of isooctane oil from the surfaces of 0.1 M  $\text{NaOH}_{(\text{aq})}$  using the superhydrophobic PU sponge.

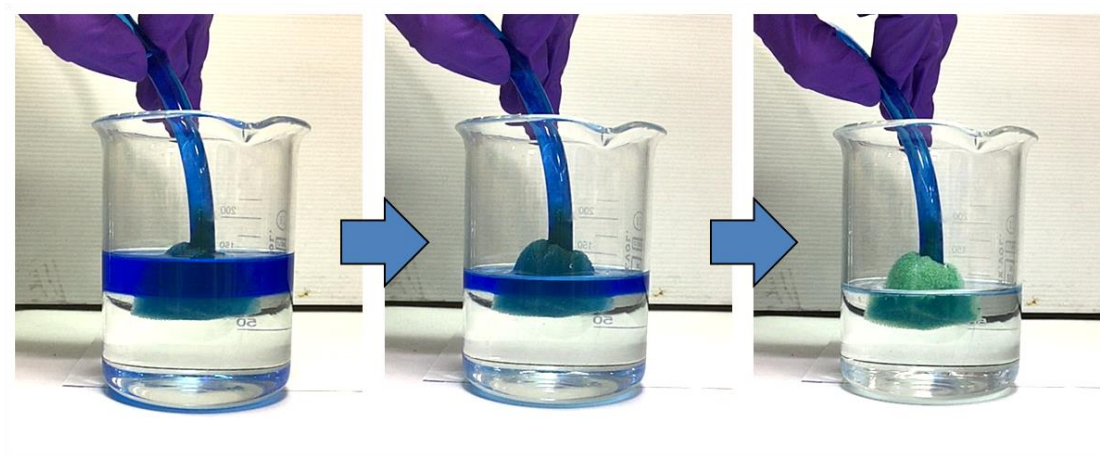

**Figure S5.** Photographs of the continuous absorption and removal of isooctane oil from the surfaces of 3.5 wt %  $\text{NaCl}_{(\text{aq})}$  using the superhydrophobic PU sponge.
